# Supplementary material
Source: PubMed Central journal article supplement (PMC5098045)

Figure S1. Flow chart illustrating the different filtering methodology used to analyse the differentially expressed proteins among biofilm samples of haploid and diploid *Candida albicans*.

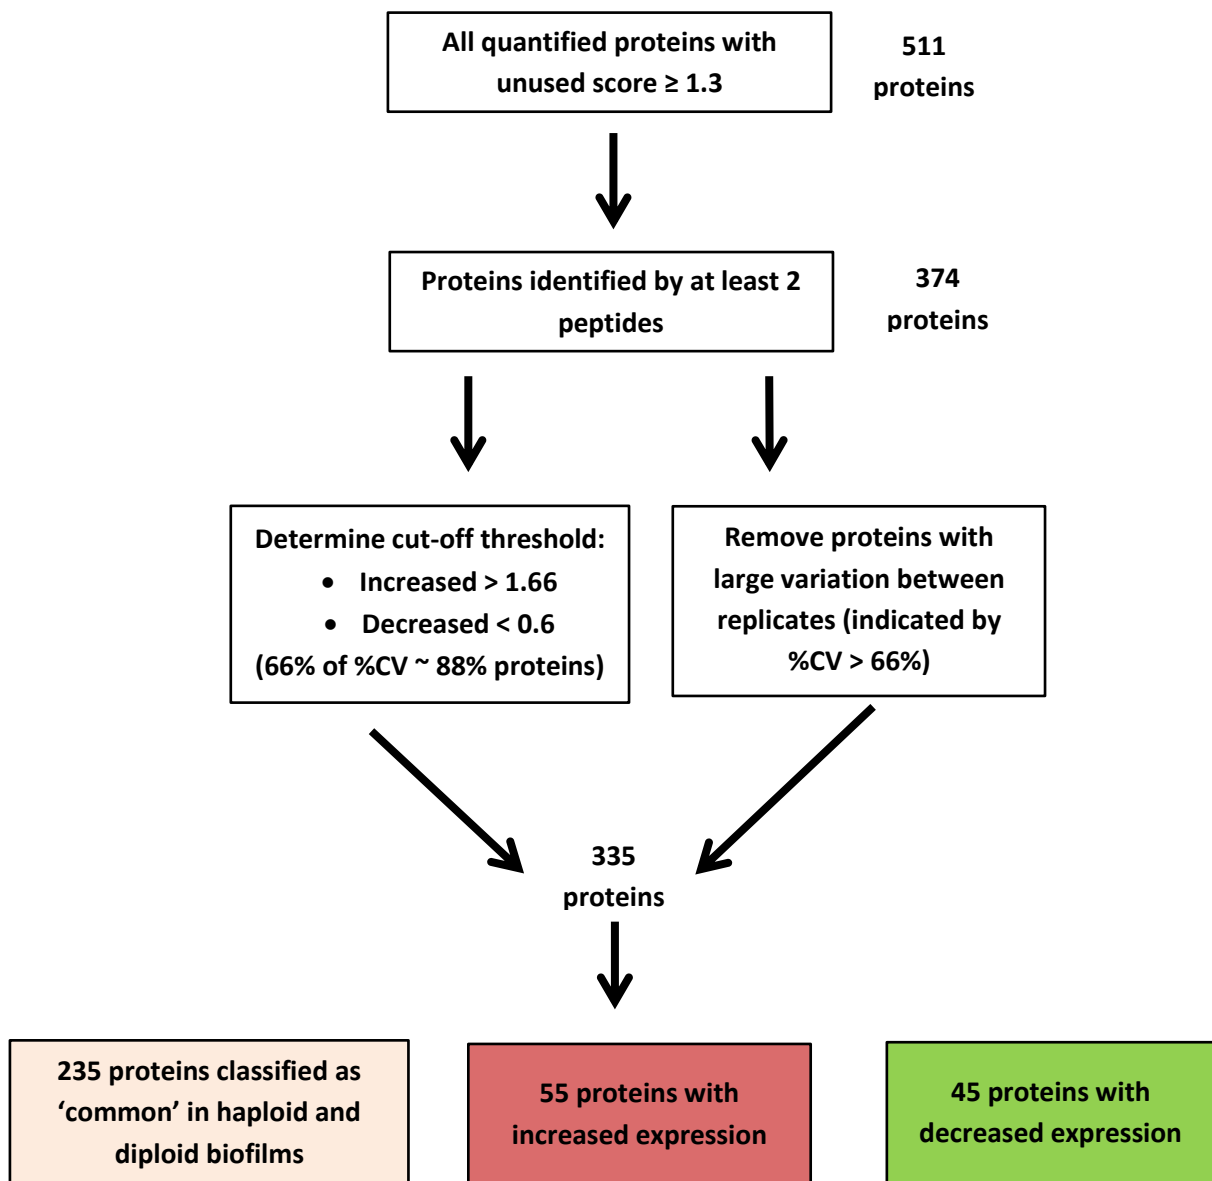

Supplement: 10.1074_M116.061523_mcp.M116.061523-1.pdf [file 10.1074_M116.061523_mcp.M116.061523-1.pdf]
