# Supplementary material
Source: PubMed Central journal article supplement (PMC5098045)

**Figure S2. Percent variation in iTRAQ ratios between the same protein found in various replicates following MS.** The primary vertical axis represents the corresponding number of the proteins (bars) having different % co-efficient of variation (%CV) that was plotted in the horizontal axis. The secondary vertical axis represents the cumulative % of the counted proteins (lines). Eighty eight percent of the proteins had less than 66% of %CV. Accordingly; the regulation cut-off was set at 1.66-fold and 0.6-fold (1/1.66).

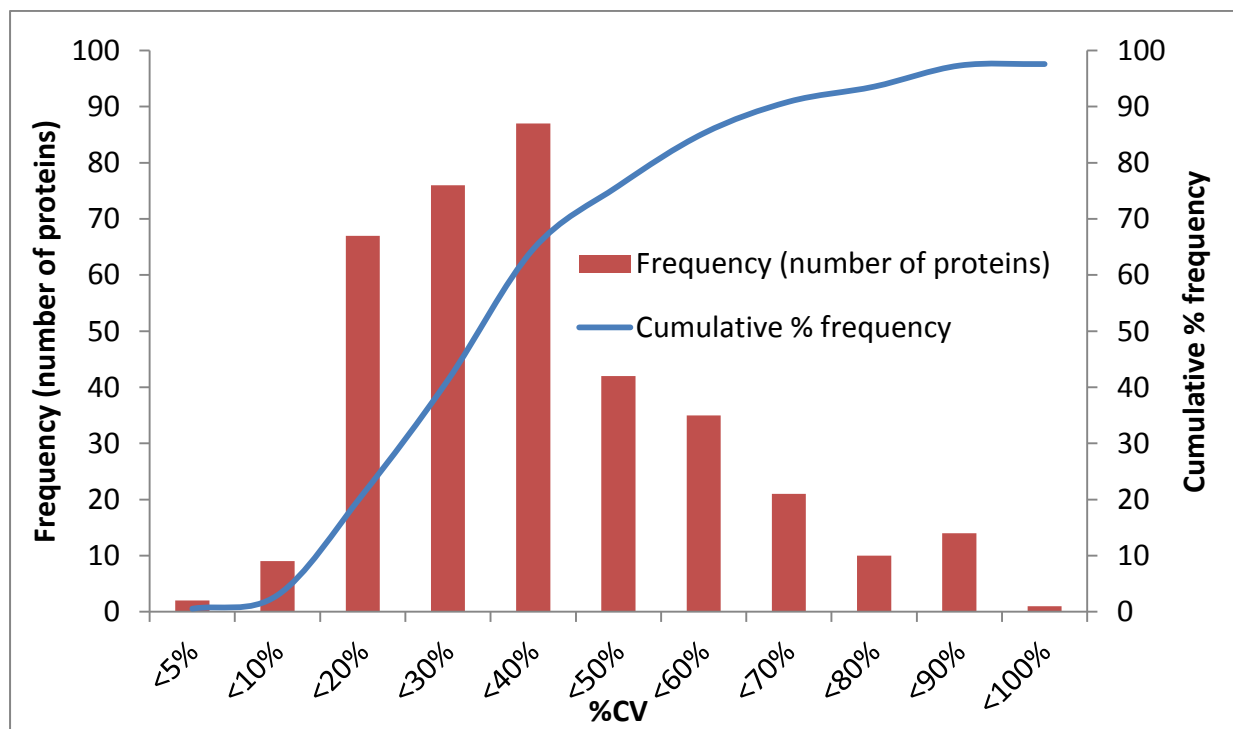

Supplement: 10.1074_M116.061523_mcp.M116.061523-2.pdf [file 10.1074_M116.061523_mcp.M116.061523-2.pdf]
