# Supplementary material
Source: PubMed Central journal article supplement (PMC5098045)

**Figure S3. Transcriptomic expression confirmation of selected genes in *C. albicans* 72 h biofilms.** mRNA and protein from 72 h *C. albicans* biofilm of BWP17 and GZY803 were extracted and fold expression of selected genes were examined using Real-time PCR. Fold expression was normalized to *ACT1* and *PMA1*. Mean of at least three replicates is shown, with error bars showing SD.

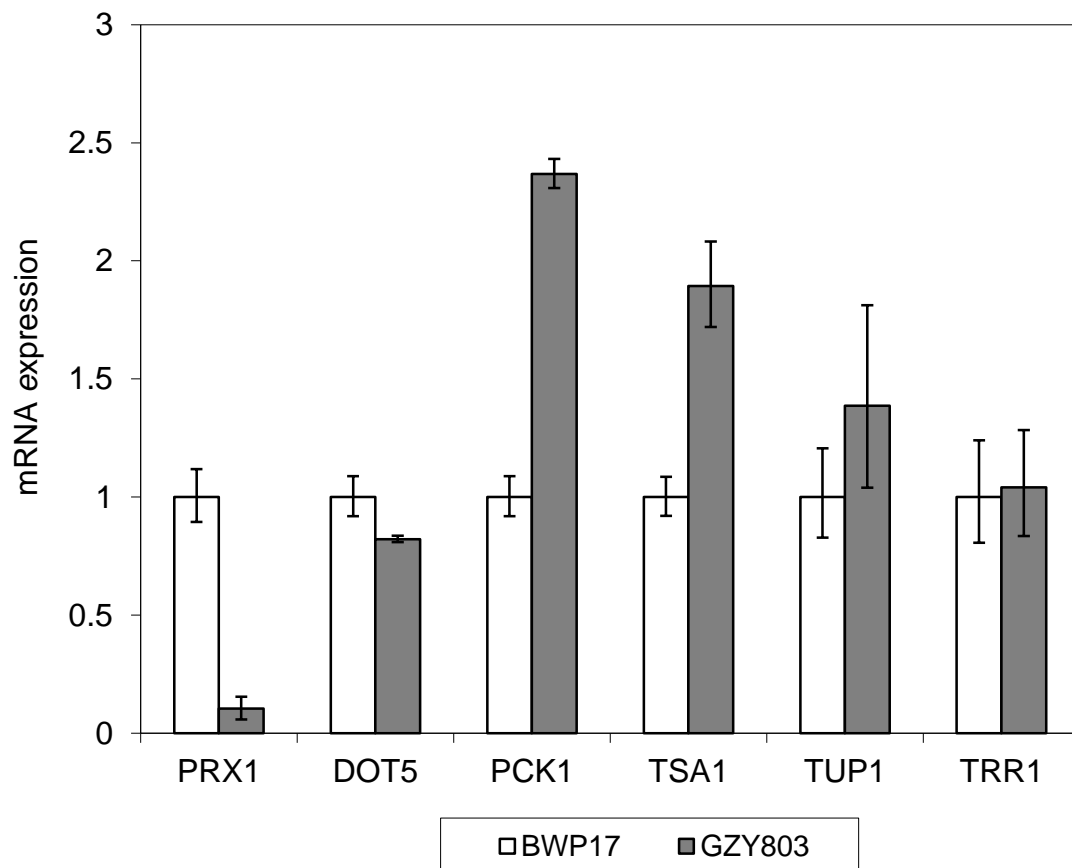

Supplement: 10.1074_M116.061523_mcp.M116.061523-3.pdf [file 10.1074_M116.061523_mcp.M116.061523-3.pdf]
