# Supplementary material
Source: PubMed Central journal article supplement (PMC5098045)

**Figure S4. Qualifying *C. albicans* 72 h *ira2* $\Delta/\Delta$  biofilm susceptibility as compared to BWP17 biofilms.** Seventy two hour *C. albicans* biofilms of *ira2* $\Delta/\Delta$  and BWP17 strains were exposed to 32  $\mu$ g/ml of Caspofungin (CAS), Fluconazole (FLC), Ketoconazole (KTC), Voriconazole (VOR), or 4  $\mu$ g/ml amphotericin B (AMB) for 24 h. Biofilms were solubilized in 1 ml of PBS and an amount of 3  $\mu$ l from the solution was spotted on SDA agar and incubated at 30 °C for 48 h. Viability of the biofilm cells were recorded for each antifungal tested.

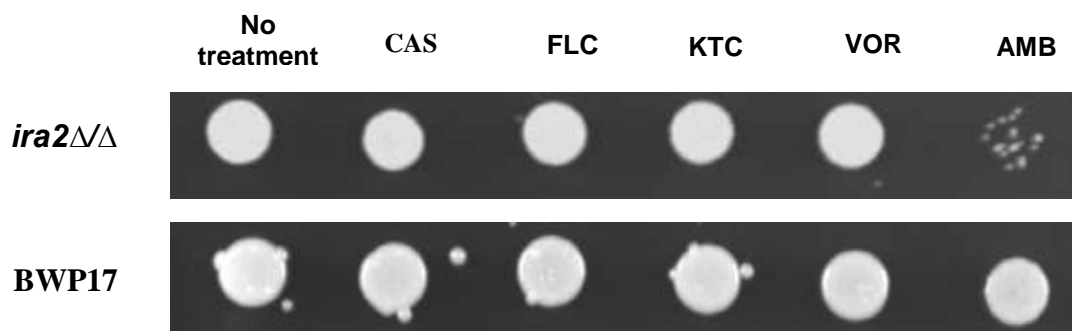

Supplement: 10.1074_M116.061523_mcp.M116.061523-4.pdf [file 10.1074_M116.061523_mcp.M116.061523-4.pdf]
