# Supplementary material
Source: PubMed Central journal article supplement (PMC5098045)
Supplement: 10.1074_M116.061523_mcp.M116.061523-5.pdf [file 10.1074_M116.061523_mcp.M116.061523-5.pdf]

**Table S1. List of *C. albicans* strains, plasmids and primers used in the study**

**A. Yeast strains used in this study**

| Strain  | Genotype                                                                                                          | Source     |
|---------|-------------------------------------------------------------------------------------------------------------------|------------|
| SC5314  | Wild type diploid                                                                                                 | (1)        |
| BWP17   | <i>ura3::imm434/ura3::imm434 his1::hisG/his1::hisG arg4::hisG/arg4::hisG</i>                                      | (2)        |
| GZY792  | <i>MTLa his4</i>                                                                                                  | (3)        |
| GZY803  | <i>MTLa his4 ura3Δ::HIS4</i>                                                                                      | (3)        |
| GZY923  | <i>ura3::imm434/ura3::imm434 his1::hisG/his1::hisG arg4::hisG/arg4::hisG ira2Δ::HIS1/ira2Δ::FRT</i>               | (4)        |
| GZY1022 | <i>ura3::imm434/ura3::imm434 his1::hisG/his1::hisG arg4::hisG/arg4::hisG ira2Δ::HIS1/ira2Δ::FRT IRA2-Myc-URA3</i> | (4)        |
| GZY1162 | <i>ira2Δ/Δ</i> (GZY923)+TetOff-Myc-AHP1                                                                           | This study |
| GZY1163 | GZY803+TetOff-Myc-AHP1                                                                                            | This study |
| GZY1166 | BWP17 :: AHP1-Myc                                                                                                 | This study |
| GZY1167 | <i>ira2Δ/Δ</i> (GZY923) :: AHP1-Myc                                                                               | This study |
| GZY1168 | GZY803 :: AHP1-Myc                                                                                                | This study |
| GZY1210 | <i>ura3::imm434/ura3::imm434 his1::hisG/his1::hisG arg4::hisG/arg4::hisG ahp1Δ::HIS1/ahp1Δ::UFP</i>               | This study |

**B. Plasmids constructed in this study**

| Construct | Description                                                                                                                                                                                                                                                                                                                                                                                                                                                                    |
|-----------|--------------------------------------------------------------------------------------------------------------------------------------------------------------------------------------------------------------------------------------------------------------------------------------------------------------------------------------------------------------------------------------------------------------------------------------------------------------------------------|
| CIP10U    | <i>Candida albicans</i> integration vector with <i>URA3</i> as the selection marker; generated by replacing the <i>RP10</i> gene in the vector Clp10 (5) with 700 bp <i>GAL1</i> untranslated region (UTR) at <i>Clal</i> and <i>PstI</i> sites.                                                                                                                                                                                                                               |
| pYGS1273  | TetOff-Myc-AHP1-UTR*-TetR/CIP10U; The coding region of <i>AHP1</i> gene (1 to 528 bp) was PCR amplified and cloned (between <i>Clal</i> and <i>PacI</i> ) in frame after an N-terminal 6xMyc epitope which is controlled by a tetracycline repressible promoter (6), and before <i>UTR</i> which is followed by TetR, into CIP10U. The plasmid was linearized by <i>Ascl</i> (generated by site-directed mutagenesis) within UTR* for integration to generate TetOff-Myc-AHP1. |
| pYGS1276  | AHP1c-Myc-UTR/CIP10U; The partial region of <i>AHP1</i> gene (28 to 528 bp) was PCR amplified and cloned (between <i>KpnI</i> and <i>XhoI</i> ) in frame in front of an N-terminal 6xMyc epitope (between <i>XhoI</i> and <i>Clal</i> ), followed by <i>UTR</i> (between <i>Clal</i> and <i>PstI</i> ), into CIP10U. The plasmid was linearized by <i>HindIII</i> within <i>AHP1</i> for integration to generate AHP1-Myc.                                                     |
| pYGS1307  | AHP1Δ::UFP/pBKS; <i>AHP1</i> promoter region (~500 bp) and terminator region (~450 bp) were amplified by PCR and cloned into the vector pBKS at <i>KpnI-XhoI</i> and <i>NotI-SacI</i> sites, respectively, to flank the <i>URA3</i> flipper (7) (UFP) located between <i>XhoI</i> and <i>NotI</i> . The knock-out cassette was released by <i>KpnI</i> and <i>SacI</i> for transformation to generate <i>ahp1Δ::UFP</i> .                                                      |
| pYGS1308  | AHP1Δ::HIS1/pBKS; <i>HIS1</i> was amplified by PCR and cloned into pYGS1307 at <i>XhoI-NotI</i> to replace UFP. The knock-out cassette was released by <i>KpnI</i> and <i>SacI</i> for transformation to generate <i>ahp1Δ::HIS1</i> .                                                                                                                                                                                                                                         |

### C. Primers used in this study

| Gene name | Primer sequence                                                                               | Reference |
|-----------|-----------------------------------------------------------------------------------------------|-----------|
| ACT1      | Forward: 5'-GCTTTTGGTGTGGACGAGTTTCT-3'<br>Reverse: 5'-GTGAGCCGGGAAATCTGTATAGTC-3'             | (8)       |
| PMA1      | Forward: 5'-TTGCTTATGATAATGCTCCATACGA-3'<br>Reverse: 5'-TACCCACAAATCTTGGCAAGT-3'              | (9)       |
| AHP1      | Forward: 5'-CTGCTGTGCCTGGTGCTT-3'<br>Reverse: 5'-TTGACGCCCTTGTCTTTGA-3'                       | (10)      |
| PRX1      | Forward: 5'-GTGTGTAGCACCGAGCTTTCTGCGTTC-3'<br>Reverse: 5'-TCCAGTCGGAATTTGCTTCAACAGGGT-3'      | (11)      |
| DOT5      | Forward: 5'-CCAAAGAACCAGAGGCTGTCACCGAAC-3'<br>Reverse: 5'-AATTTTTTACCAATCCCAATCCAGCA-3'       | (11)      |
| PCK1      | Forward: 5'-AAGGGGTTGAAAAAGGTGATGTC-3'<br>Reverse: 5'-ATGCGGAGAATGTAGCGTGTG-3'                | (12)      |
| TSA1      | Forward: 5'-TCCAAAGGGTGTCTTGAGACAAATCACCAT-3'<br>Reverse: 5'-TTCCTTGGATGCTTCTGGGCTTGG-3'      | (11)      |
| TUP1      | Forward: 5'-CAAATCTTGAGGGGCCACGAAC-3'<br>Reverse: 5'-CTAAGGACCCGGAAGCGATTTGTT-3'              | (12)      |
| TRR1      | Forward: 5'-TGGACTGAATGGAATGAAGATGCAGAACC-3'<br>Reverse: 5'-GTCACAAACAGCACAGGCAGAAATACCTTG-3' | (11)      |
