# Supplementary material
Source: PubMed Central journal article supplement (PMC5098045)
Supplement: 10.1074_M116.061523_mcp.M116.061523-6.pdf [file 10.1074_M116.061523_mcp.M116.061523-6.pdf]

**Table S2. List of gene ontologies (GOs) that significantly alter in *C. albicans* haploid biofilms as compared to diploid biofilms**

| <b>GO-ID up-associated with increased protein expression in haploid biofilms</b> |                                        |                |                     |
|----------------------------------------------------------------------------------|----------------------------------------|----------------|---------------------|
| <b>GO-ID</b>                                                                     | <b>Description</b>                     | <b>p-value</b> | <b>corr p-value</b> |
| 15986                                                                            | ATP synthesis coupled proton transport | 1.45E-07       | 1.26E-05            |
| 45333                                                                            | Cellular respiration                   | 2.80E-06       | 6.38E-05            |
| 43648                                                                            | Dicarboxylic acid metabolic process    | 3.82E-06       | 7.83E-05            |
| 9163                                                                             | Nucleoside biosynthetic process        | 1.26E-06       | 3.39E-05            |
| <b>GO-ID associated with decreased protein expression in diploid biofilms</b>    |                                        |                |                     |
| <b>GO-ID</b>                                                                     | <b>Description</b>                     | <b>p-value</b> | <b>corr p-value</b> |
| 6096                                                                             | Glycolytic process                     | 4.65E-17       | 1.07E-14            |
| 3735                                                                             | Structural constituent of ribosome     | 2.35E-10       | 4.23E-09            |
| 5618                                                                             | Cell wall                              | 2.29E-09       | 2.44E-08            |
| 9116                                                                             | Nucleoside metabolic process           | 1.90E-09       | 2.18E-08            |
